# Supplementary material for: Influence of Rhamnolipids and Ionic Cross-Linking Conditions on the Mechanical Properties of Alginate Hydrogels as a Model Bacterial Biofilm
Source: MDPI journal article supplement (doi:10.3390/ijms22136840), 2021-06-25
Supplement: s1 [file s1]

## Supplementary Materials

### Influence of rhamnolipids and ionic cross-linking conditions on the mechanical properties of alginate hydrogels as a model bacterial biofilm

Czaplicka Natalia <sup>1\*</sup>, Mania Szymon <sup>2</sup>, Konopacka-Łyskawa Donata <sup>1</sup>

<sup>1</sup> Department of Process Engineering and Chemical Technology, Faculty of Chemistry, Gdańsk University of Technology, Narutowicza 11/12, 80-233 Gdańsk, Poland

<sup>2</sup> Department of Chemistry, Technology and Biotechnology of Food, Faculty of Chemistry, Gdańsk University of Technology, Narutowicza 11/12, 80-233 Gdańsk, Poland

\* corresponding author: natalia.czaplicka@pg.edu.pl, tel. +48 58 347 21 14

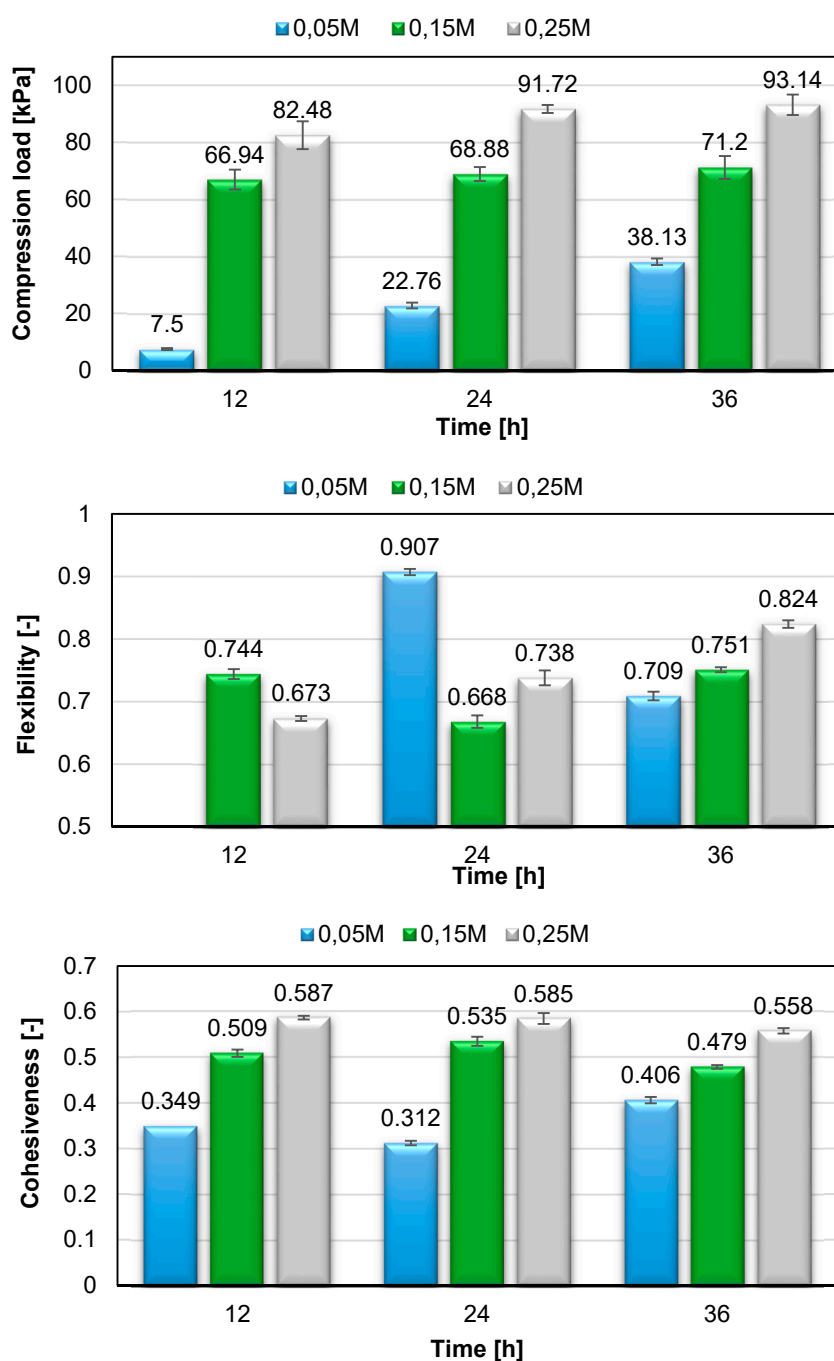

**Figure S1.** Mechanical properties of the control hydrogels samples as a function of cross-linking time and CaCl<sub>2</sub> concentration.

**Table S1.** ANOVA results of the quadratic model for compression load

| Source                              | Degrees of freedom (df) | Sum of squares (SS) | Mean square (MS) | F-value       | p-value      |
|-------------------------------------|-------------------------|---------------------|------------------|---------------|--------------|
| Regression                          | 9                       | 11374.9             | 1263.87          | <b>25.25</b>  | <b>0.001</b> |
| Linear                              | 3                       | 8352.9              | 2784.29          | <b>55.62</b>  | <b>0.000</b> |
| A – CaCl <sub>2</sub> concentration | 1                       | 7194.0              | 7194.00          | <b>143.72</b> | <b>0.000</b> |
| B – rhamnolipids concentration      | 1                       | 767.1               | 767.14           | <b>15.33</b>  | <b>0.011</b> |
| C – ion cross-linking time          | 1                       | 391.7               | 391.72           | <b>7.83</b>   | <b>0.038</b> |
| Square                              | 3                       | 2325.0              | 774.98           | <b>15.48</b>  | <b>0.006</b> |
| A <sup>2</sup>                      | 1                       | 50.3                | 50.27            | 1.00          | 0.362        |
| B <sup>2</sup>                      | 1                       | 12.6                | 12.64            | 0.25          | 0.637        |
| C <sup>2</sup>                      | 1                       | 2313.2              | 2313.23          | <b>46.21</b>  | <b>0.001</b> |
| 2-way interaction                   | 3                       | 697.1               | 232.35           | 4.64          | 0.066        |
| AB                                  | 1                       | 484.0               | 484.00           | <b>9.67</b>   | <b>0.027</b> |
| AC                                  | 1                       | 210.8               | 210.83           | 4.21          | 0.095        |
| BC                                  | 1                       | 2.2                 | 2.22             | 0.04          | 0.842        |
| Residual error                      | 5                       | 250.3               | 50.06            | -             | -            |
| Lack of fit                         | 3                       | 247.0               | 82.32            | <b>49.47</b>  | <b>0.020</b> |
| R <sup>2</sup>                      |                         | <b>0.9785</b>       |                  |               |              |

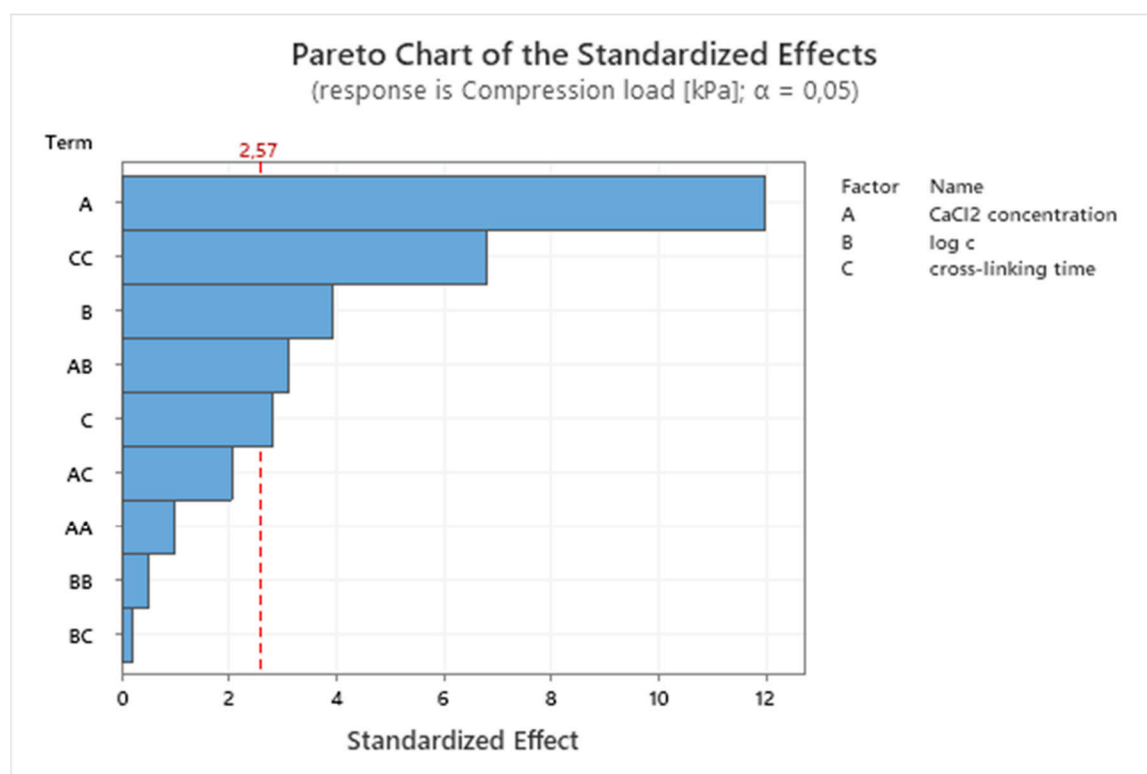**Figure S2.** Pareto chart of the standardized effects for compression load.

**Table S2.** ANOVA results of the quadratic model for flexibility

| Source                              | Degrees of freedom (df) | Sum of squares (SS) | Mean square (MS) | F-value      | p-value      |
|-------------------------------------|-------------------------|---------------------|------------------|--------------|--------------|
| Regression                          | 9                       | 0.042461            | 0.004718         | 3.85         | 0.104        |
| Linear                              | 3                       | 0.018727            | 0.006242         | 5.09         | 0.075        |
| A – CaCl <sub>2</sub> concentration | 1                       | 0.017595            | 0.017595         | <b>14.35</b> | <b>0.019</b> |
| B – rhamnolipids concentration      | 1                       | 0.001128            | 0.001128         | 0.92         | 0.392        |
| C – ion cross-linking time          | 1                       | 0.001789            | 0.001789         | 1.46         | 0.294        |
| Square                              | 3                       | 0.018144            | 0.006048         | 4.93         | 0.079        |
| A <sup>2</sup>                      | 1                       | 0.013142            | 0.013142         | <b>10.72</b> | <b>0.031</b> |
| B <sup>2</sup>                      | 1                       | 0.000979            | 0.000979         | 0.80         | 0.422        |
| C <sup>2</sup>                      | 1                       | 0.005792            | 0.005792         | 4.72         | 0.095        |
| 2-way interaction                   | 3                       | 0.014440            | 0.004813         | 3.93         | 0.110        |
| AB                                  | 1                       | 0.007140            | 0.007140         | 5.82         | 0.073        |
| AC                                  | 1                       | 0.004163            | 0.004163         | 3.40         | 0.139        |
| BC                                  | 1                       | 0.003136            | 0.003136         | 2.56         | 0.185        |
| Residual error                      | 4                       | 0.004904            | 0.001226         | -            | -            |
| Lack of fit                         | 2                       | 0.004704            | 0.002352         | <b>23.52</b> | <b>0.041</b> |
| R <sup>2</sup>                      |                         | <b>0.8965</b>       |                  |              |              |

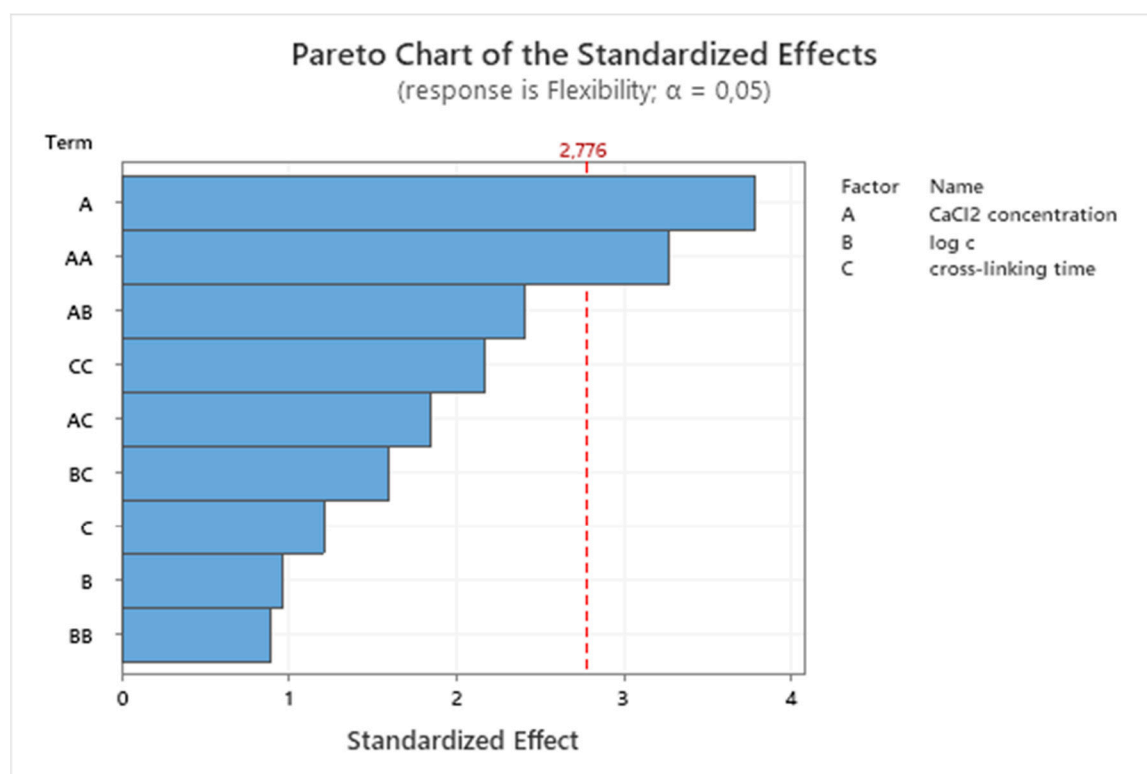**Figure S3.** Pareto chart of the standardized effects for flexibility.

**Table S3.** ANOVA results of the quadratic model for cohesiveness

| Source                              | Degrees of freedom (df) | Sum of squares (SS) | Mean square (MS) | F-value      | p-value      |
|-------------------------------------|-------------------------|---------------------|------------------|--------------|--------------|
| Regression                          | 9                       | 0.167702            | 0.018634         | <b>11.14</b> | <b>0.008</b> |
| Linear                              | 3                       | 0.117219            | 0.039073         | <b>23.36</b> | <b>0.002</b> |
| A – CaCl <sub>2</sub> concentration | 1                       | 0.104653            | 0.104653         | <b>62.57</b> | <b>0.001</b> |
| B – rhamnolipids concentration      | 1                       | 0.000004            | 0.000004         | 0.00         | 0.961        |
| C – ion cross-linking time          | 1                       | 0.012561            | 0.012561         | 7.51         | 0.041        |
| Square                              | 3                       | 0.038970            | 0.012990         | <b>7.77</b>  | <b>0.025</b> |
| A <sup>2</sup>                      | 1                       | 0.015901            | 0.015901         | <b>9.51</b>  | <b>0.027</b> |
| B <sup>2</sup>                      | 1                       | 0.002520            | 0.002520         | 1.51         | 0.274        |
| C <sup>2</sup>                      | 1                       | 0.017771            | 0.017771         | <b>10.62</b> | <b>0.022</b> |
| 2-way interaction                   | 3                       | 0.011513            | 0.003838         | 2.29         | 0.195        |
| AB                                  | 1                       | 0.005329            | 0.005329         | 3.19         | 0.134        |
| AC                                  | 1                       | 0.001560            | 0.001560         | 0.93         | 0.378        |
| BC                                  | 1                       | 0.004624            | 0.004624         | 2.76         | 0.157        |
| Residual error                      | 5                       | 0.008363            | 0.001673         | -            | -            |
| Lack of fit                         | 3                       | 0.008075            | 0.002692         | 18.69        | 0.051        |
| R <sup>2</sup>                      |                         | <b>0.9525</b>       |                  |              |              |

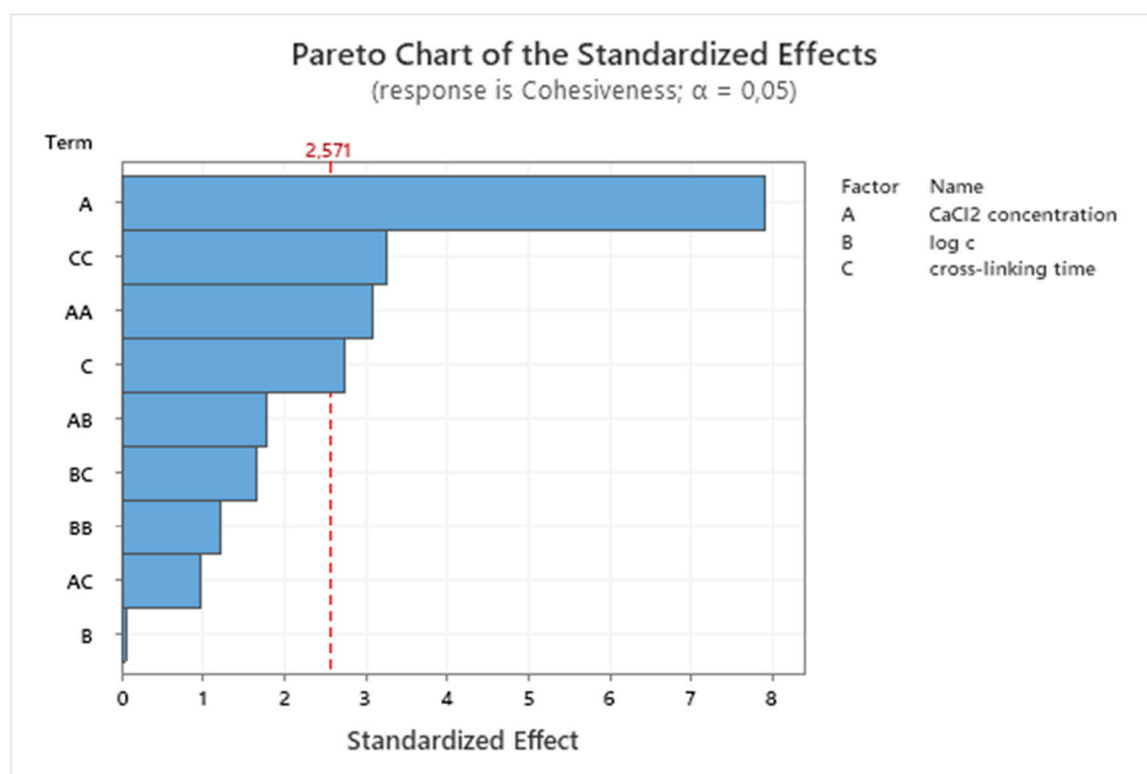**Figure S4.** Pareto chart of the standardized effects for cohesiveness.
